# Supplementary material for: The structural characterization and anticancer activity of a polysaccharide fromCoriolus versicolor
Source: Royal Society of Chemistry journal article supplement (doi:10.1039/d2nj00897a), 2022-01-01
Supplement: d2nj00897a1.pdf [file d2nj00897a1.pdf]

*New Journal of Chemistry*

**Structural characterization and anticancer activity of a polysaccharide from**  
*Coriolus versicolor*

Jiahui Wang<sup>a</sup>, Jing Nie<sup>a</sup>, De Wang<sup>a</sup>, Hui Liu<sup>a</sup>, Meng Liu<sup>a</sup>, Yanjing Yang<sup>a\*</sup>, Shian  
Zhong<sup>a\*</sup>

<sup>a</sup>*College of Chemistry and Chemical Engineering, Central South University,  
Changsha 410083, China*

\*Corresponding author:

College of Chemistry and Chemical Engineering, Central South University, Changsha,  
Hunan, 410083, China

Tel: +86 0731 88879616; Fax: +86 0731 88879616;

E-mail: [yangyanjing@csu.edu.cn](mailto:yangyanjing@csu.edu.cn) (Yanjing Yang)

E-mail: [zhongshian@aliyun.com](mailto:zhongshian@aliyun.com) (Shian Zhong)

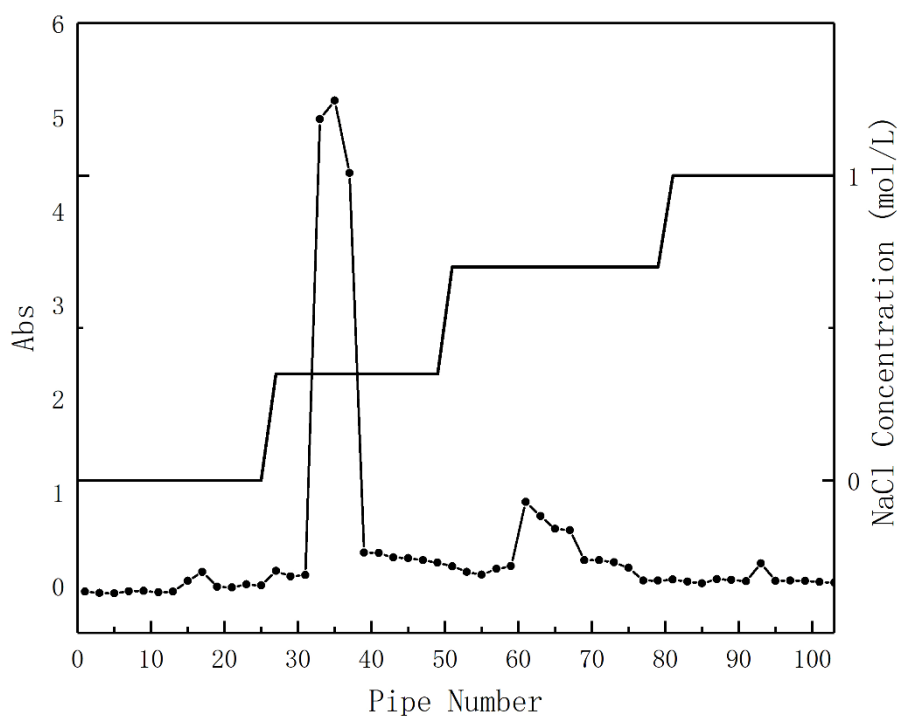

**Fig. S1** The elution curve of YZP on the DEAE-52 cellulose column

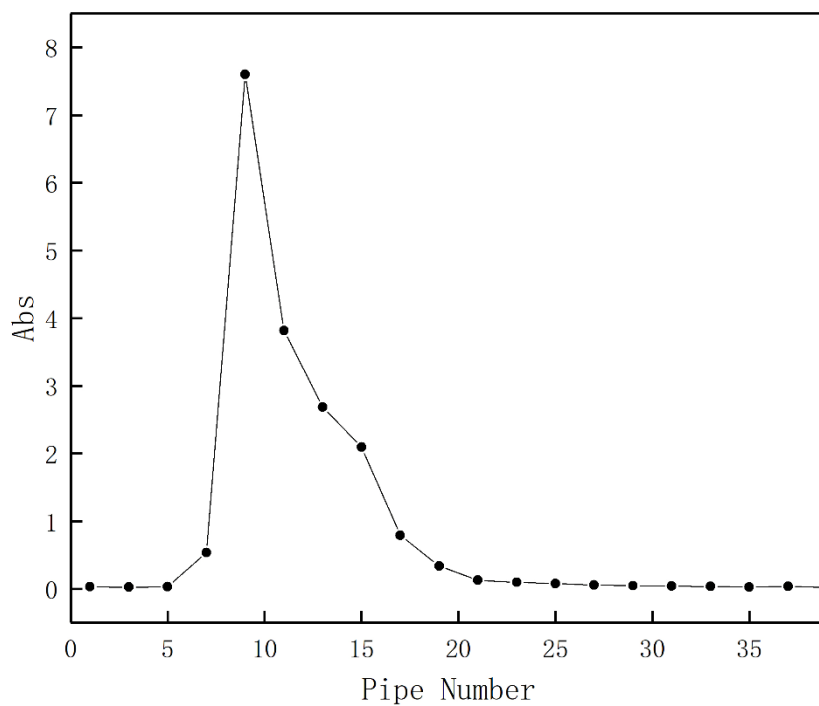

**Fig. S2** The elution curve of YZP-1 on the Sephadex G-100 column

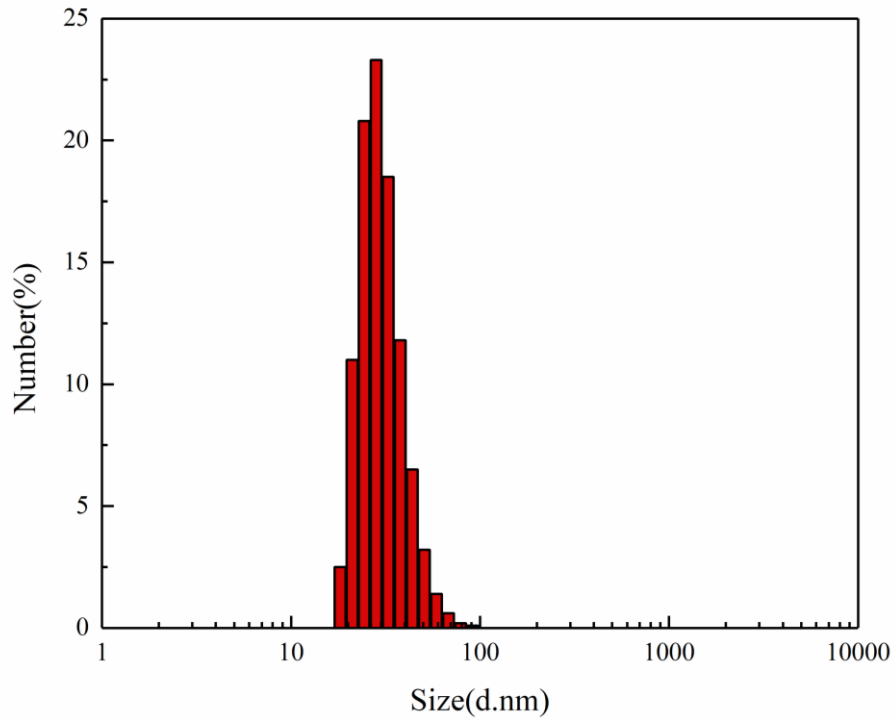

**Fig. S3** DLS particle size distribution of YZP-1a

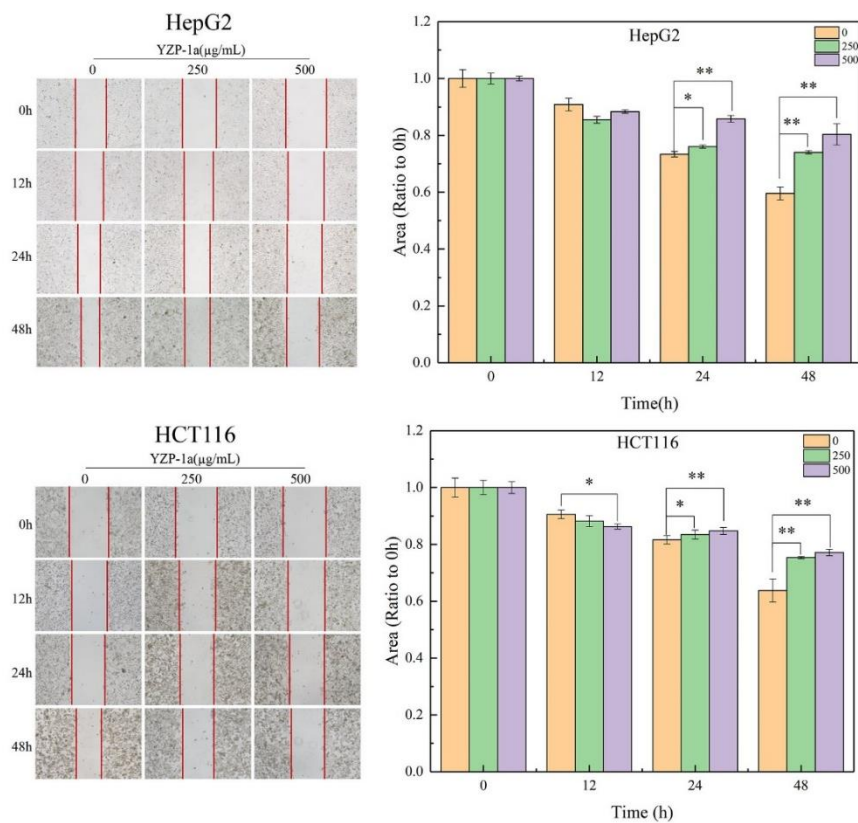

**Fig. S4** Wound healing degree of HCT116 and HepG2 cells treated with YZP-1a for 0, 12, 24, and

48 h. The results are expressed as mean  $\pm$  S.D, and \* P < 0.05, \*\* P < 0.01.

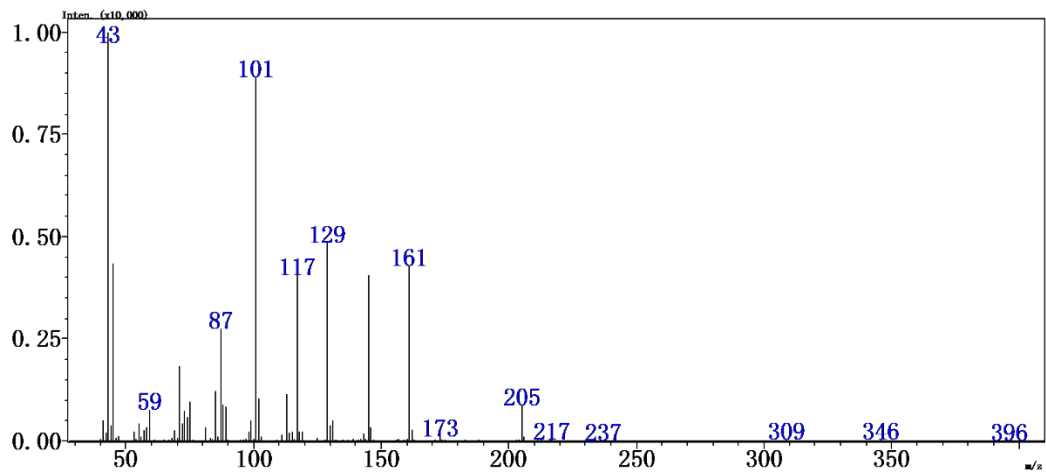

Fig. S5 The mass spectrum of Glcp-(1→)

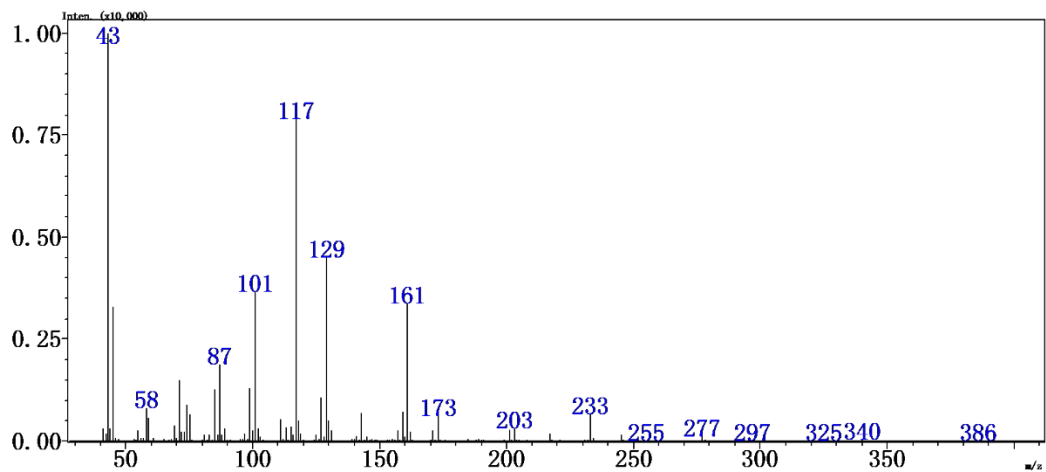

Fig. S6 The mass spectrum of →3)-Galp-(1→)

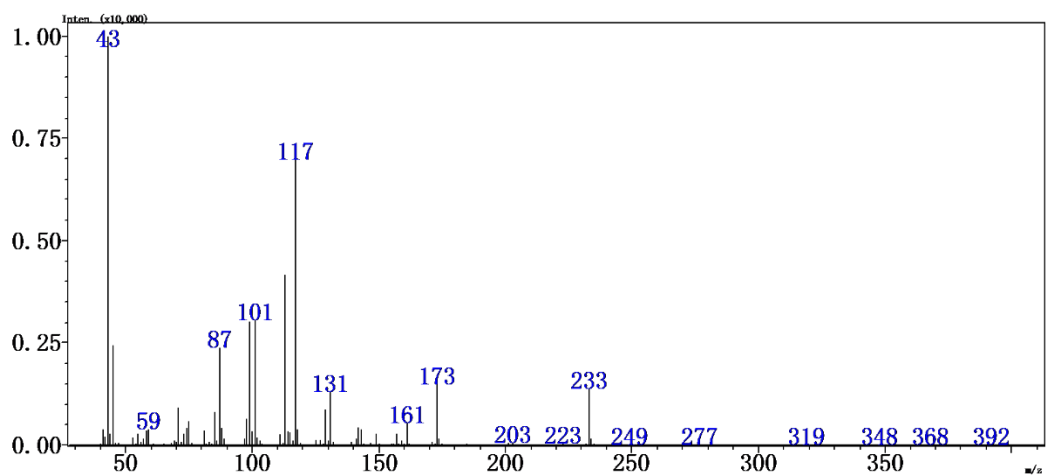

Fig. S7 The mass spectrum of →4)-Galp-(1→)

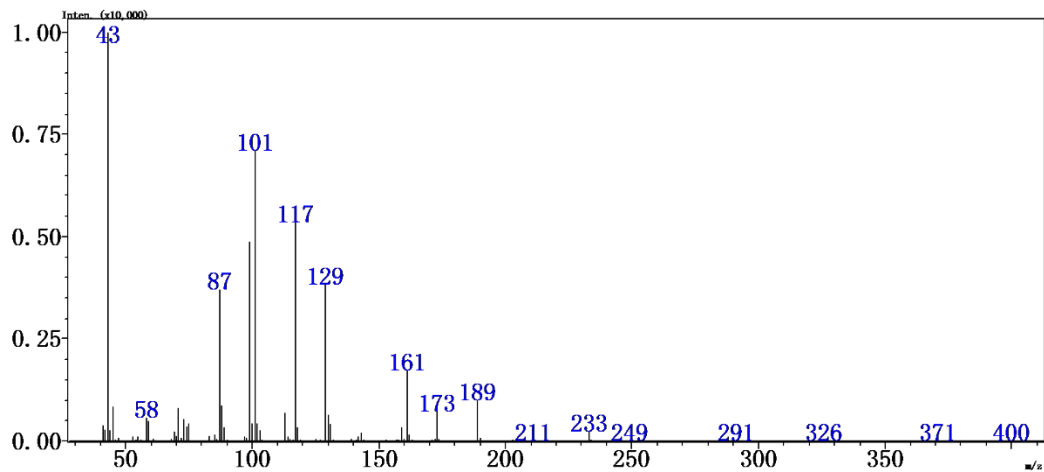

**Fig. S8** The mass spectrum of  $\rightarrow 6)-\text{Glc}-(1\rightarrow$

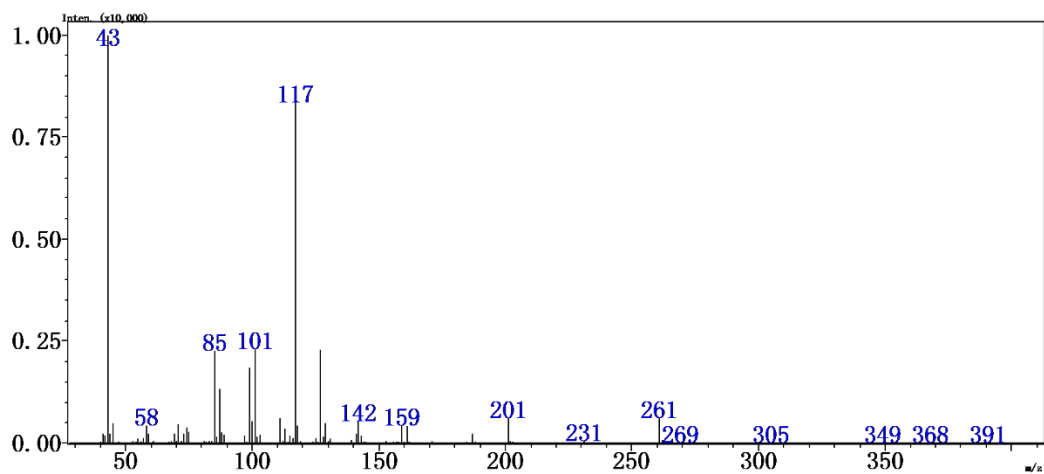

**Fig. S9** The mass spectrum of  $\rightarrow 4,6)-\text{Glc}-(1\rightarrow$

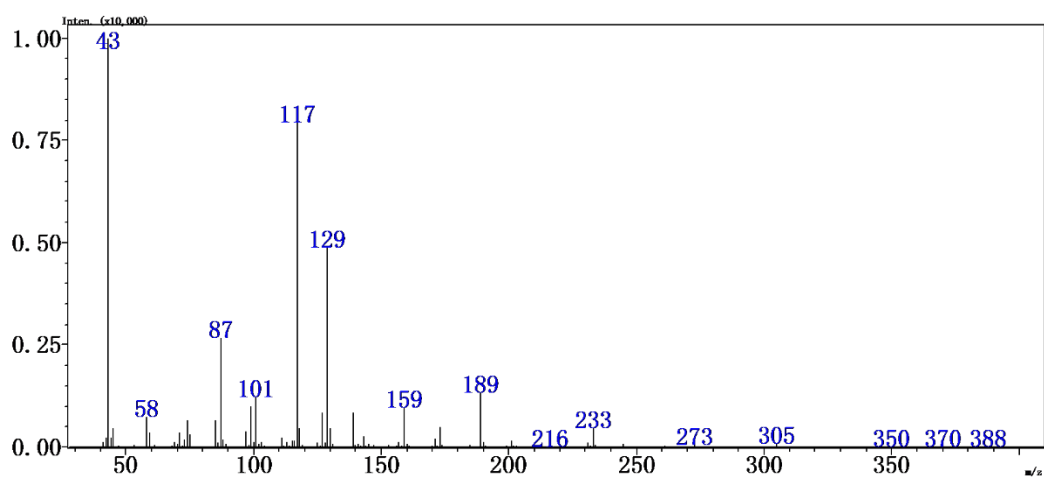

**Fig. S10** The mass spectrum of  $\rightarrow 3,6)-\text{Galp}-(1\rightarrow$
